# Supplementary material for: Bismuth doping effect on TiO2nanofibres for morphological change and photocatalytic performance
Source: Royal Society of Chemistry journal article supplement (doi:10.1039/c4ce01348d), 2014-10-21
Supplement: c4ce01348d1.pdf [file c4ce01348d1.pdf]

## Supporting information

### Bismuth doping effect on $\text{TiO}_2$ nanofibres for morphological change and photocatalytic performance

Ming-Chung Wu\*, Jyun-Sian Chih and Wei-Kang Huang

*Department of Chemical and Materials Engineering, College of Engineering, Chang Gung University, Taoyuan 33302, Taiwan.*

*E-mail: [mingchungwu@mail.cgu.edu.tw](mailto:mingchungwu@mail.cgu.edu.tw); Fax: +886-3-2118800ext.5324; Tel: +886-3-2118800ext.3545*

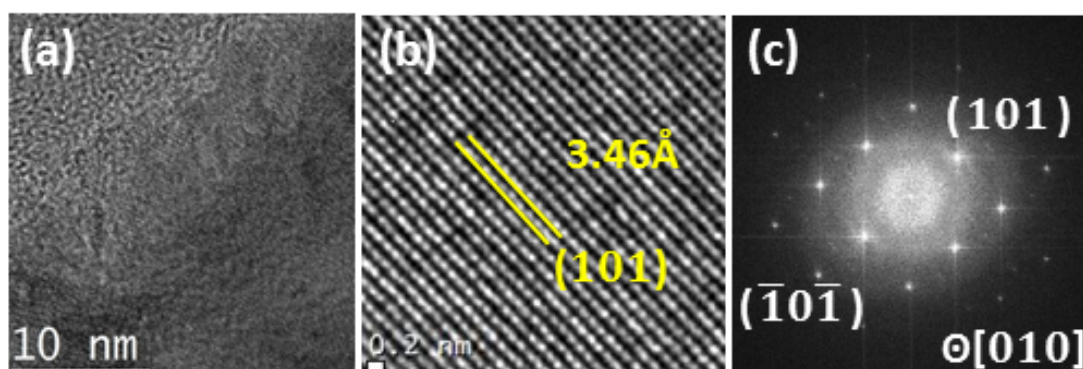

**Figure S1.** TEM image of pristine  $\text{TiO}_2$  nanofibre catalysts **(a)**, and its high-magnification of the lattice **(b)** with the corresponding fast Fourier transformed pattern of this specimen **(c)**.
